# Supplementary material for: Embigin is involved in the regulation of early mouse kidney development
Source: Research Square preprint supplement (doi:10.21203/rs.3.rs-7750633/v1), 2025-11-12
Supplement: Supplementary file 1 [file 89bf0f1d7a5b3256a65a8ba5.pdf]

# Supplementary Information

## Embigin is involved in the regulation of early mouse kidney development

Salli Talvi<sup>1,2,3</sup>, Johanna Jokinen<sup>1,2,3</sup>, Pekka Rappu<sup>1,3</sup>, Roni Leppäkoski<sup>1,2,3</sup>, Kristen Kurtzeborn<sup>4</sup>, Pia Rantakari<sup>5,3</sup>, Satu Kuure<sup>4</sup>, Jyrki Heino<sup>1,2,3</sup>

<sup>1</sup>Department of Life Technologies, University of Turku, FI-20014 Turku, Finland

<sup>2</sup>MediCity Research Laboratory, University of Turku, FI-20014 Turku, Finland

<sup>3</sup>InFLAMES Research Flagship, University of Turku, FI-20014 Turku, Finland

<sup>4</sup>Helsinki Institute of Life Science / Research Programs Unit, Faculty of Medicine, University of Helsinki, FI-00100 Helsinki, Finland

<sup>5</sup>Turku Bioscience Centre, University of Turku, FI-20014 Turku, Finland



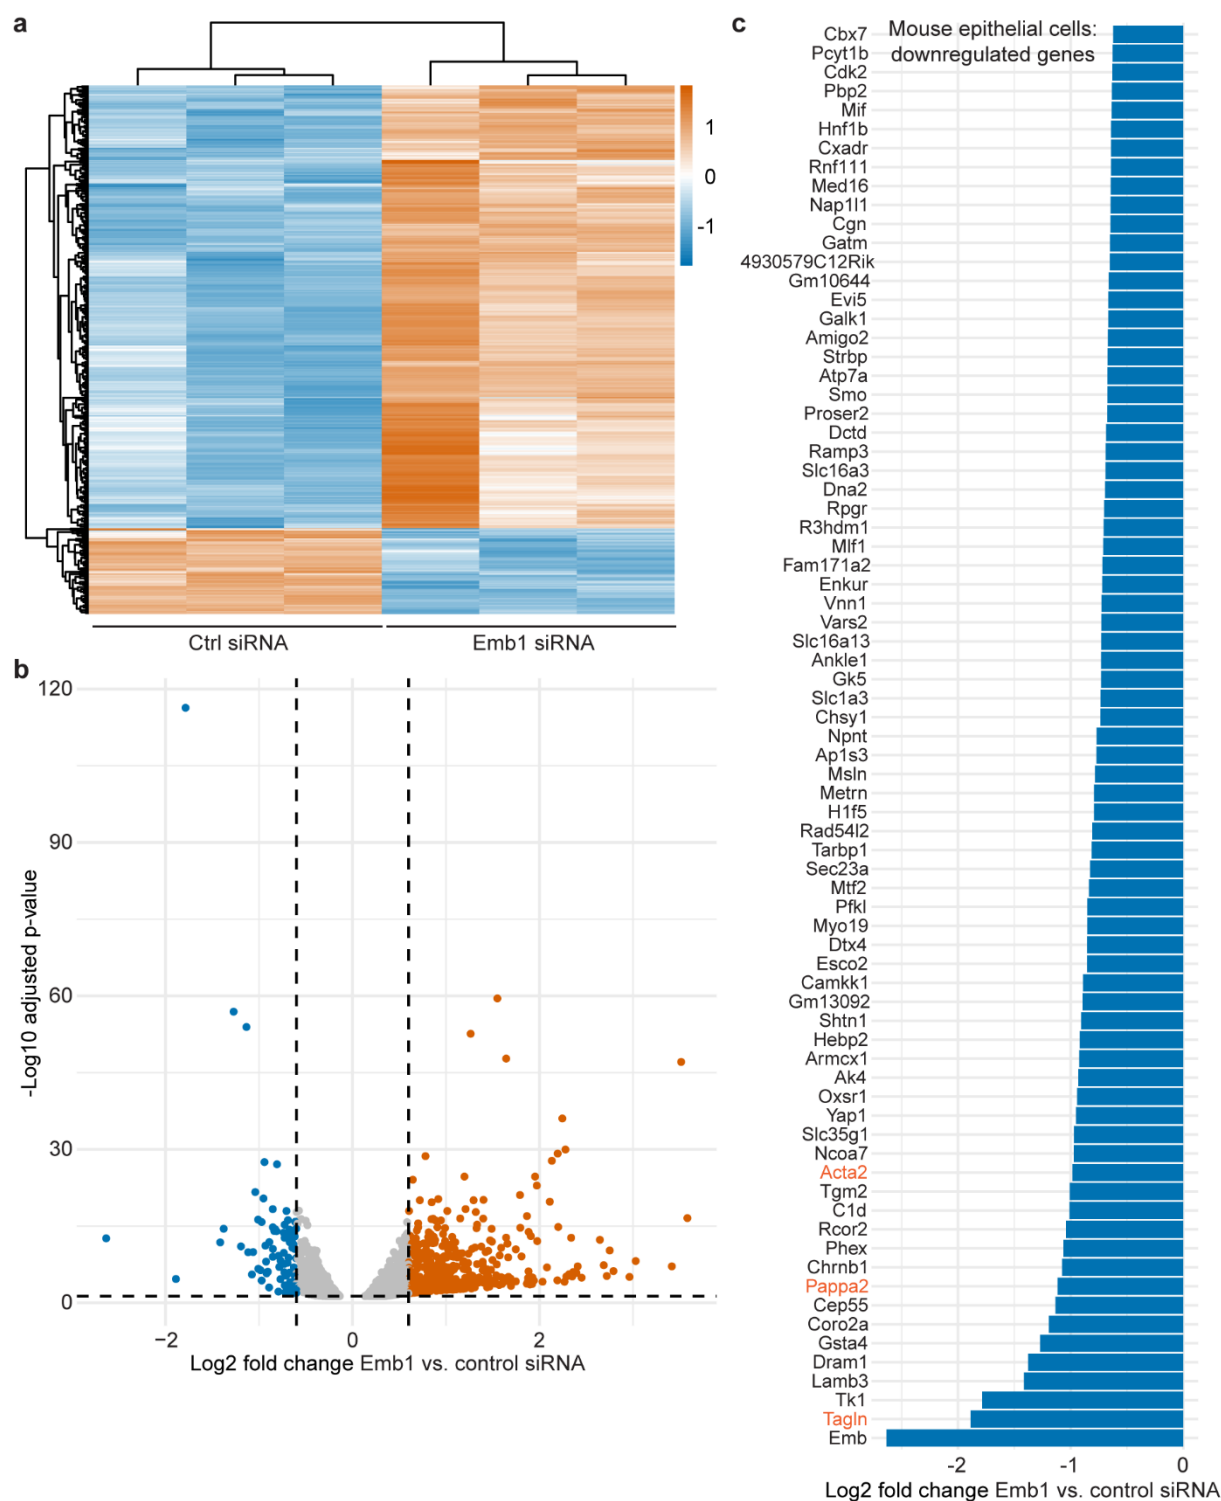

**Supplementary Fig. 2. Knockdown of embigin in mouse epithelial cells leads to differential expression of several genes involved in kidney development.** (a) Heatmap of differentially expressed genes ( $\log_2\text{FC} > 0.6$  or  $< -0.6$  and adjusted  $p$ -value  $< 0.05$ ) in mouse epithelial cells treated with Emb1 siRNA ( $n = 3$ ) and negative control siRNA ( $n = 3$ ) based on RNA-seq analysis. (b) Volcano plot of the differentially expressed genes ( $\log_2\text{FC} > 0.6$  or  $< -0.6$  and adjusted  $p$ -value

< 0.05) in mouse epithelial cells treated with Emb1 siRNA (n = 3) vs. negative control siRNA (n = 3) based on RNA-seq analysis. (c) Bar plot of the 75 most downregulated genes ( $\log_2FC > 0.6$  or  $< -0.6$  and adjusted p-value < 0.05) based on RNA-seq analysis of Emb1 siRNA- and negative control siRNA-treated mouse epithelial cells. The three genes also downregulated in E13.5 Emb<sup>-/-</sup> kidneys are highlighted: *Pappa2*, *Acta2*, and *Tagln*.

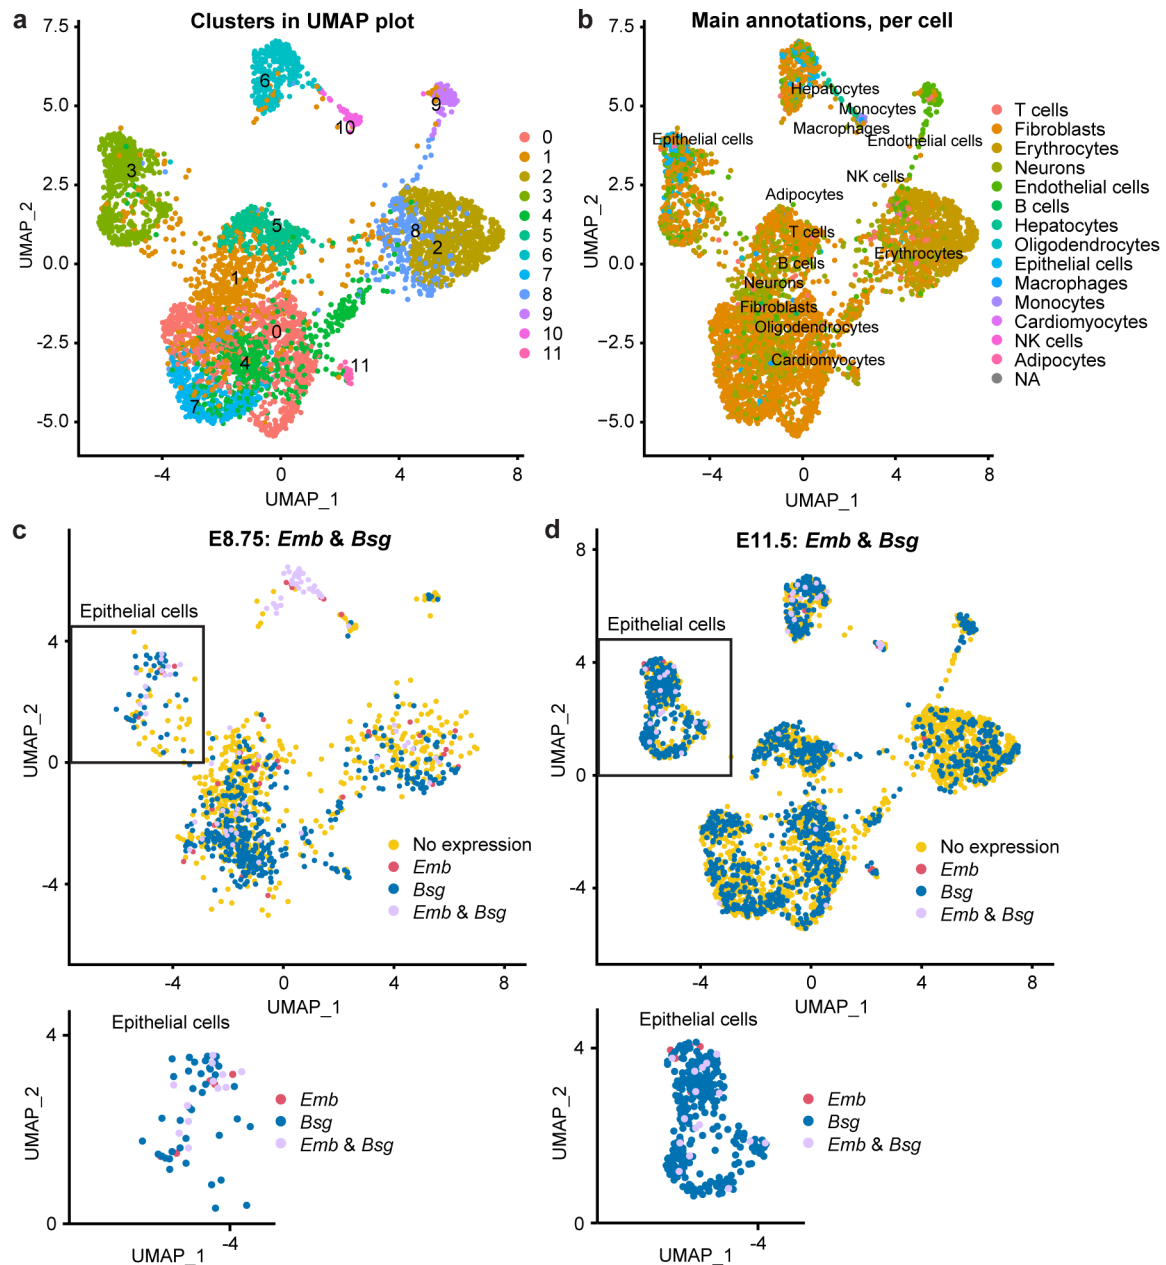

**Supplementary Fig. 3. Reanalysis of mouse embryonic single-cell RNA sequencing data reveals the presence of embigin in the kidney primordium. Embigin is also co-expressed with basigin during early kidney development.** (a-b) Single-cell RNA sequencing (scRNA-seq) data<sup>31</sup> obtained from the mouse Pax2-expressing renal cells at E8.75 and the caudal urogenital system cells (containing the caudal nephric duct, the UB, the surrounding mesenchyme, and the cloaca) at E11.5 was reanalysed. The data were normalised, integrated, and clustered using the Seurat Bioconductor package implemented in Chipster. Annotation was done in R using SingleR Bioconductor package and Mouse RNA-seq data as CellDex reference. Seurat R package was used to visualize gene expression in the UMAP plots. (c-d) We analysed embigin (gene *Emb*) and basigin (gene *Bsg*) RNA expression during early kidney development from scRNA-seq data<sup>31</sup> obtained from

the mouse Pax2-expressing renal cells at E8.75 and the caudal urogenital system cells at E11.5. Smaller images are magnifications from the epithelial cell-type cluster area where the co-expression is observed.

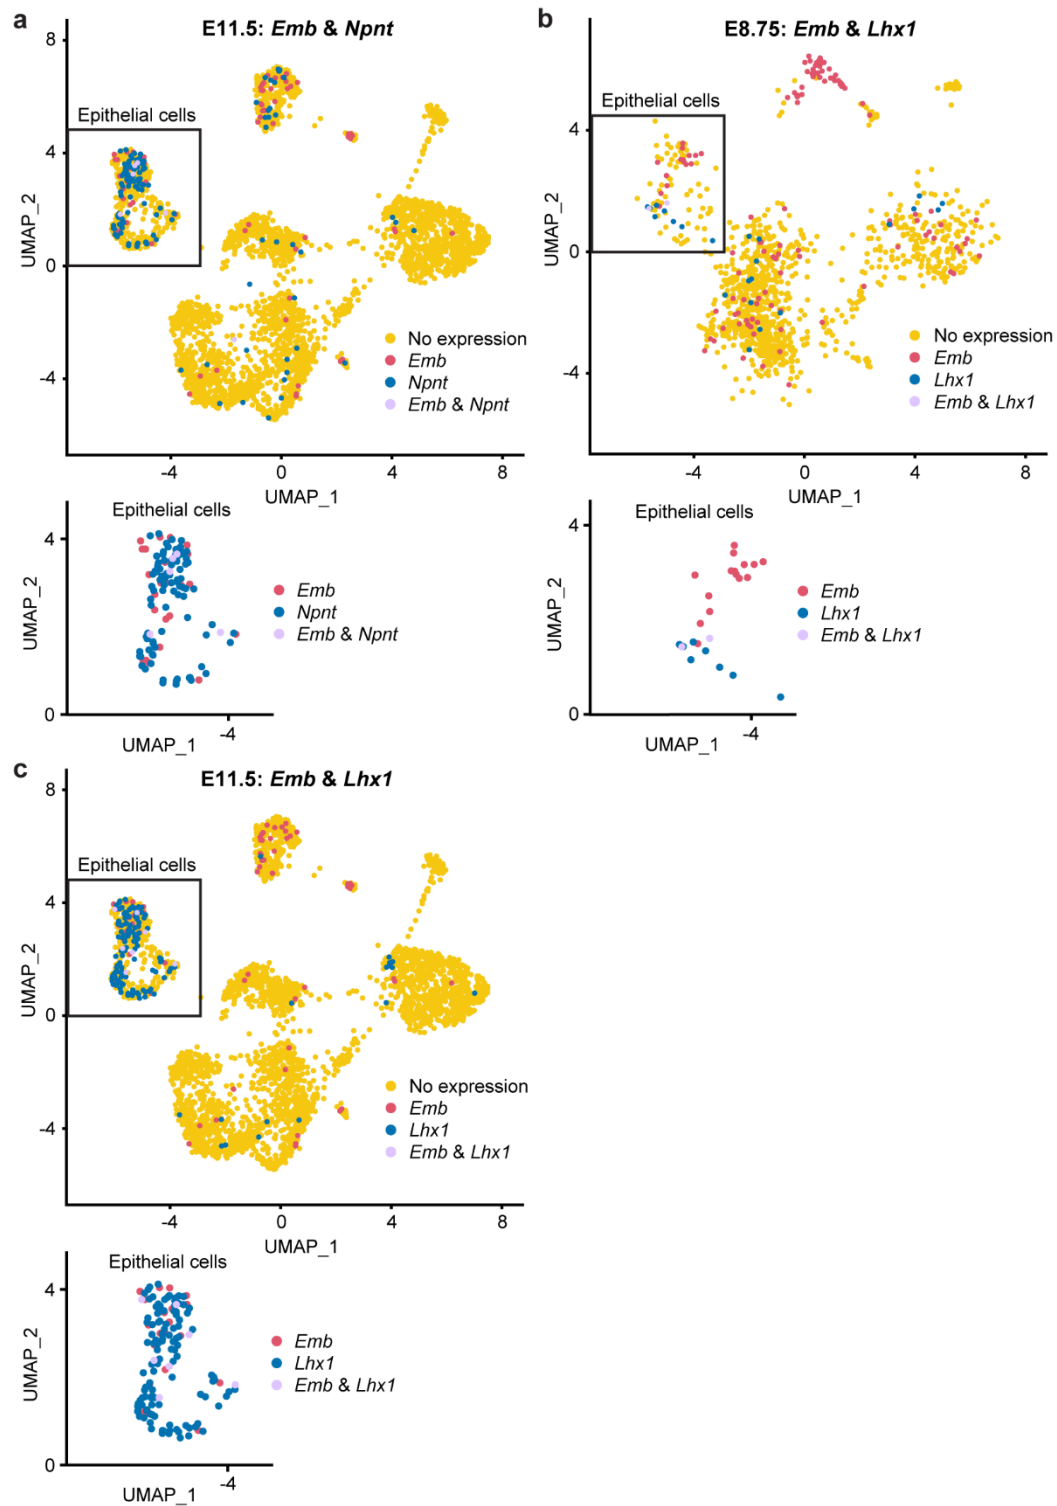

**Supplementary Fig. 4. Embigin is partially co-expressed with nephronectin and Lim1 in early renal epithelial-type cells.** We reanalysed scRNA-seq data<sup>31</sup> obtained from the caudal urogenital system cells (containing the caudal nephric duct, the UB, the surrounding mesenchyme, and the cloaca) at E11.5 for embigin (gene *Emb*) and nephronectin (gene *Npnt*) RNA expression (**a**). Additionally, embigin and Lim1 (gene *Lhx1*) RNA expression were analysed from the data obtained from the mouse Pax2-expressing renal cells at E8.75 (**b**) and the caudal urogenital system cells at

E11.5 (c). Smaller images are magnifications from the epithelial cell-type cluster area where partial co-expression is observed.



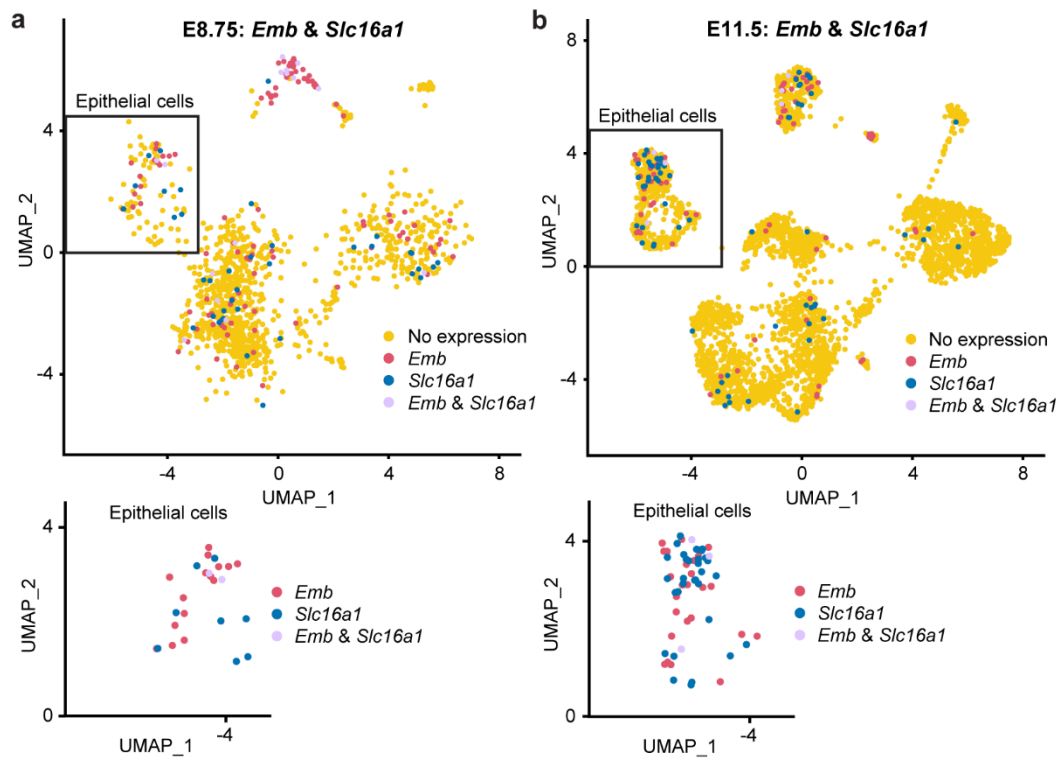

**Supplementary Fig. 5. Embigin is partially co-expressed with MCT1 in early renal epithelial-type cells.** We reanalysed scRNA-seq data<sup>31</sup> obtained from the mouse Pax2-expressing renal cells at E8.75 (a) and the caudal urogenital system cells (containing the caudal nephric duct, the UB, the surrounding mesenchyme, and the cloaca) at E11.5 (b) for embigin (gene *Emb*) and MCT1 (gene *Slc16a1*) RNA expression. Smaller images are magnifications from the epithelial cell-type cluster area where partial co-expression is observed.

**Supplementary Table 1. RNA sequencing analysis of mouse *Emb<sup>-/-</sup>* kidneys at E13.5 identified several downregulated genes associated with kidney development.**

| <b>Gene</b>     | <b>Long name</b>                                            | <b>log2FC</b> |
|-----------------|-------------------------------------------------------------|---------------|
| <i>Nphs1</i>    | Nephrosis 1, nephrin                                        | -6.2          |
| <i>R3hdml</i>   | R3H domain containing-like                                  | -5.2          |
| <i>Sim2</i>     | Single-minded family bhlh transcription factor 2            | -2.3          |
| <i>Irx2</i>     | Iroquois homeobox 2                                         | -2.0          |
| <i>Irx1</i>     | Iroquois homeobox 1                                         | -1.9          |
| <i>Hnf4a</i>    | Hepatic nuclear factor 4, alpha                             | -1.9          |
| <i>Ptpro</i>    | Protein tyrosine phosphatase receptor type O                | -1.5          |
| <i>Slc22a6</i>  | Solute carrier family 22 member 6                           | -1.4          |
| <i>Folr1</i>    | Folate receptor alpha                                       | -1.2          |
| <i>Slc39a5</i>  | Solute carrier family 39 member 5                           | -1.1          |
| <i>Ren1</i>     | Renin 1 structural                                          | -1.1          |
| <i>Nkx6-1</i>   | NK6 homeobox 1                                              | -1.1          |
| <i>Pappa2</i>   | Pregnancy-associated plasma protein A2, pappalysin 2        | -1.0          |
| <i>Acta2</i>    | Actin alpha 2, smooth muscle, aorta                         | -1.0          |
| <i>Clc5</i>     | Chloride intracellular channel 5                            | -1.0          |
| <i>Aqp1</i>     | Aquaporin 1                                                 | -0.9          |
| <i>Cbln4</i>    | Cerebellin 4 precursor protein                              | -0.9          |
| <i>Cldn1</i>    | Claudin 1                                                   | -0.9          |
| <i>Sall3</i>    | Spalt like transcription factor 3                           | -0.8          |
| <i>Foxa1</i>    | Forkhead box A1                                             | -0.8          |
| <i>Hes5</i>     | Hes family bhlh transcription factor 5                      | -0.8          |
| <i>Tagln</i>    | Transgelin                                                  | -0.7          |
| <i>Hmgcs2</i>   | 3-hydroxy-3-methylglutaryl-Coenzyme A synthase 2            | -0.7          |
| <i>Cacna2d2</i> | Calcium channel, voltage-dependent, alpha 2/delta subunit 2 | -0.7          |
| <i>Lama3</i>    | Laminin, alpha 3                                            | -0.7          |
| <i>Osr2</i>     | Odd-skipped related 2                                       | -0.7          |
| <i>Enpep</i>    | Glutamyl aminopeptidase                                     | -0.7          |
| <i>Irx5</i>     | Iroquois homeobox 5                                         | -0.7          |
| <i>Nog</i>      | Noggin                                                      | -0.7          |
| <i>Reln</i>     | Reelin                                                      | -0.7          |
| <i>Erb4</i>     | Erb-b2 receptor tyrosine kinase 4                           | -0.6          |

**Supplementary Table 2. RNA sequencing analysis of embigin-silenced mouse epithelial cells identified several downregulated genes involved in kidney development.**

| <b>Gene</b>   | <b>Long name</b>                                                   | <b>log2FC</b> |
|---------------|--------------------------------------------------------------------|---------------|
| <i>Tagln</i>  | Transgelin                                                         | -1.9          |
| <i>Pappa2</i> | Pregnancy-associated plasma protein A2, pappalysin 2               | -1.1          |
| <i>Chrn1</i>  | Cholinergic receptor nicotinic beta 1 subunit                      | -1.1          |
| <i>Tgm2</i>   | Transglutaminase 2, C polypeptide                                  | -1.0          |
| <i>Acta2</i>  | Actin alpha 2, smooth muscle, aorta                                | -1.0          |
| <i>Yap1</i>   | Yes-associated protein 1                                           | -1.0          |
| <i>Mtf2</i>   | Metal response element binding transcription factor 2              | -0.8          |
| <i>Npnt</i>   | Nephronectin                                                       | -0.8          |
| <i>Chsy1</i>  | Chondroitin sulfate synthase 1                                     | -0.7          |
| <i>Enkur</i>  | Enkurin, TRPC channel interacting protein                          | -0.7          |
| <i>Smo</i>    | Smoothened, frizzled class receptor                                | -0.7          |
| <i>Atp7a</i>  | ATPase, Cu <sup>++</sup> transporting, alpha polypeptide           | -0.7          |
| <i>Gatm</i>   | Glycine amidinotransferase (L-arginine:glycine amidinotransferase) | -0.7          |
| <i>Rnf111</i> | Ring finger 111                                                    | -0.6          |
| <i>Cxadr</i>  | Coxsackie virus and adenovirus receptor                            | -0.6          |
| <i>Hnf1b</i>  | HNF1 homeobox B                                                    | -0.6          |
| <i>Wnt7b</i>  | Wingless-type MMTV integration site family, member 7B              | -0.6          |
